# Supplementary material
Source: PubMed Central journal article supplement (PMC10115149)
Supplement: NIHMS1762501-supplement-1.pdf [file NIHMS1762501-supplement-1.pdf]

## Supplementary Materials

### Supplementary Table 1: Protocol

|                                          |                                                                                                                                                                                                                                                                                                                                                                                                                                                                                                                                                           |
|------------------------------------------|-----------------------------------------------------------------------------------------------------------------------------------------------------------------------------------------------------------------------------------------------------------------------------------------------------------------------------------------------------------------------------------------------------------------------------------------------------------------------------------------------------------------------------------------------------------|
| <b>Study designs:</b>                    | Clinical guidelines or guidance from four US-based GI professional societies: American Gastroenterological Association [AGA], American College of Gastroenterology [ACG], American Association of Liver Diseases [AASLD], and American Society of Gastrointestinal Endoscopy [ASGE])                                                                                                                                                                                                                                                                      |
| <b>Inclusion and exclusion criteria:</b> |                                                                                                                                                                                                                                                                                                                                                                                                                                                                                                                                                           |
| - Patients                               | All individuals                                                                                                                                                                                                                                                                                                                                                                                                                                                                                                                                           |
| - Intervention                           | Clinical recommendation contingent on an individual's race or ethnicity                                                                                                                                                                                                                                                                                                                                                                                                                                                                                   |
| - Comparison                             | None                                                                                                                                                                                                                                                                                                                                                                                                                                                                                                                                                      |
| - Setting                                | Outpatient or inpatient settings                                                                                                                                                                                                                                                                                                                                                                                                                                                                                                                          |
| - Other                                  | Published between January 1, 2010 and September 1, 2021. Official documentation of one of the four professional societies outlined above. If there was uncertainty regarding whether a document was expired or an official society-sponsored document, a review of each professional society's website was conducted.                                                                                                                                                                                                                                     |
| <b>Data collection</b>                   | A rapid review was conducted utilizing 1 reviewer (SMS).                                                                                                                                                                                                                                                                                                                                                                                                                                                                                                  |
| - Databases                              | ECRI Guidelines Trust, PubMed                                                                                                                                                                                                                                                                                                                                                                                                                                                                                                                             |
| - Other sources                          | Professional Society websites: <ul style="list-style-type: none"><li>- AGA: <a href="https://gastro.org/guidelines/">https://gastro.org/guidelines/</a></li><li>- AASLD: <a href="https://www.aasld.org/publications/practice-guidelines">https://www.aasld.org/publications/practice-guidelines</a></li><li>- ACG: <a href="https://gi.org/guidelines/">https://gi.org/guidelines/</a></li><li>- ASGE: <a href="https://www.asge.org/home/resources/key-resources/guidelines">https://www.asge.org/home/resources/key-resources/guidelines</a></li></ul> |
| <b>Data synthesis</b>                    | Qualitative                                                                                                                                                                                                                                                                                                                                                                                                                                                                                                                                               |
| <b>Search strategy</b>                   | (((((American Gastroenterological Association) ) OR (American College of Gastroenterology)) OR (American Association for the study of Liver Diseases)) OR (American Society for Gastrointestinal Endoscopy)) AND (guideline[MeSH Major Topic] OR guidance[MeSH Major Topic])                                                                                                                                                                                                                                                                              |

Supplementary Figure 1: PRISMA Flow Diagram

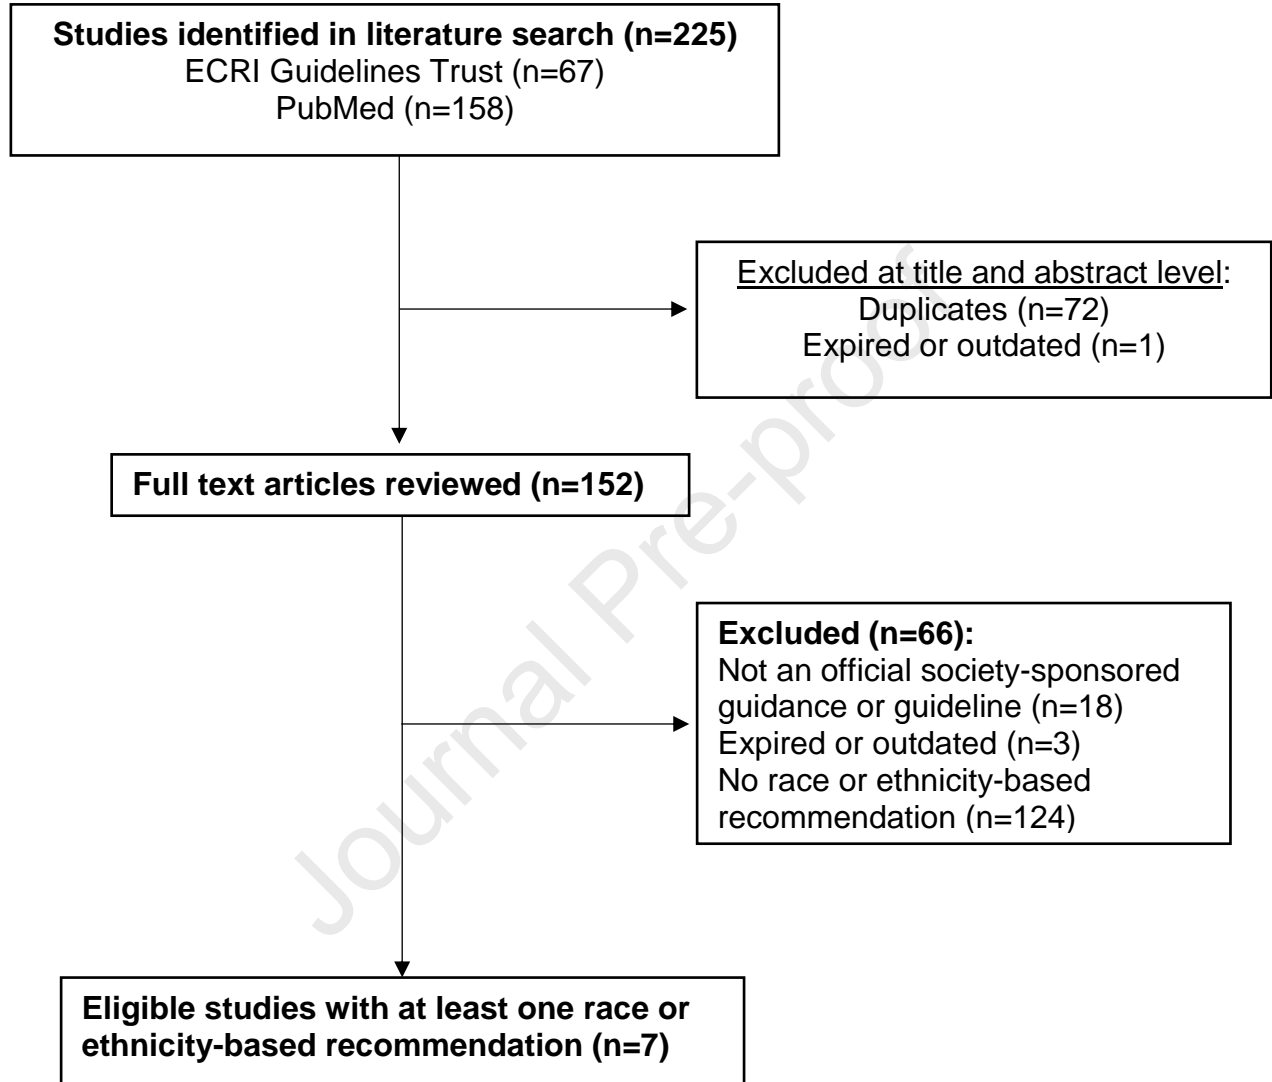

Supplementary Figure 1 Legend: PRISMA Diagram of Included studies and reasons for exclusion
